# Supplementary material for: Informing Scalable Implementation Strategies for Returning Individual Research Results: A Mixed-Methods Study Across Multisite Research Teams
Source: Research Square preprint supplement (doi:10.21203/rs.3.rs-9621011/v1), 2026-05-25
Supplement: Supplementary file 1 [file e10fe5d73eeca66da89aaf55.docx]

# Ref: Submission ID 46d0e9aa-973a-4839-9761-0836a366b4b3

# Supplement A. SRQR Reporting Checklist

| **SRQR Domain** | **Item (n=21)** | **Description** | **How Addressed in This Study** | **Page #** |
| --- | --- | --- | --- | --- |
| Title & Abstract | 1. Title | Identifies qualitative approach and topic | Title reflects IRR return and multisite implementation focus | p.1 |
| Title & Abstract | 2. Abstract | Summary of background, methods, results, conclusions | Structured abstract includes mixed-methods design, CFIR framework, and key findings | p.2 |
| Introduction/  Background | 3. Problem formulation | Description of problem and significance | Highlights gap in operationalizing IRR return in multisite research | p.4-5 |
| Introduction/  Background | 4. Purpose | Clear study aims | Aims to characterize practices, identify determinants, and inform implementation strategies | p.4-5 |
| Methods | 5. Qualitative approach & paradigm | Approach and guiding framework | Mixed-methods design with qualitative thematic analysis guided by CFIR | p.5-6 |
| Methods | 6. Researcher characteristics & reflexivity | Role of researchers and potential influence | PI facilitated focus groups; steps taken to minimize bias | p.6-7 |
| Methods | 7. Context | Setting/site description | Conducted within 26-site Lung Health Cohort network | p.6-9 |
| Methods | 8. Sampling strategy | Participant selection | Purposive sampling of LHC research team members | p.6-9 |
| Methods | 9. Ethical issues | Consent and IRB approval | Approved by UIC IRB (#2024-0782); voluntary participation | p.6 |
| Methods | 10. Data collection methods | Procedures for data collection | Web-based survey and in-person focus groups | p.6-10 |
| Methods | 11. Data collection instruments | Tools used | CFIR-informed survey and focus group guides | p. 7-10 |
| Methods | 12. Units of study | Participants | 51 survey respondents; 26 focus group participants | p.6 |
| Methods | 13. Data processing | Data management procedures | Notes documented and reconciled; survey in REDCap | p.6-10 |
| Methods | 14. Data analysis | Analytic approach | Inductive thematic analysis; mapped to CFIR domains | p.10-11 |
| Methods | 15. Techniques to enhance trustworthiness | Credibility strategies | Independent coding, consensus, triangulation | p.10-11 |
| Results/  Findings | 16. Synthesis and interpretation | Themes and patterns | Multilevel determinants identified across CFIR domains | p.10-15 |
| Results/  Findings | 17. Links to empirical data | Use of quotes/examples | Representative quotes included | p.10-15 |
| Discussion | 18. Integration with prior work/Implications | Comparison to literature | Findings contextualized with IRR literature | p.16-21 |
| Discussion | 19. Limitations | Study limitations | Addresses bias and sampling limitations | p.19 |
| Other | 20. Conflicts of interest | Disclosure | Included in manuscript | p.4 |
| Other | 21. Funding | Sources of support | ALA-ACRC, Sigma Theta Tau, NHLBI acknowledged | p.4 |

**Supplement B:** Survey Informed by CFIR Framework

| **Question** | **Response Options** | **CFIR Domain*** | **CFIR Construct(s)**** |
| --- | --- | --- | --- |
| 1. What is your role in the LHC study at your site? (Select all that apply) | PI, Research Nurse, Coordinator, Fellow/Resident, Other | Inner Setting, Process | Structural Characteristics, Roles & Responsibilities |
| 2. Are you involved in reviewing or returning lab, spirometry, and/or Chest CT results to LHC participants? | Yes/No | Inner Setting, Process | Roles & Responsibilities |
| 3. At your site, what type of research results are you returning to LHC participants? | Normal, Abnormal, Both, Not sure | Intervention Characteristics | Adaptability, Complexity |
| 4. How is your site returning LHC research results to participants? | EHR, Phone, Mail, In-person, Fax, Follow-up visits, Other | Inner Setting | Implementation Climate, Networks & Communications |
| 5. On average, what is the timing for returning lab, spirometry, and/or Chest CT results to participants? | <10 days, 11-30 days, Not returned, Do not remember, Other | Process, Inner Setting | Timing & Planning, Implementation Process |
| 6. Were LHC participants given the option to share their results with their healthcare provider? | Yes, No, Do not know | Outer Setting, Process | Participant Needs & Resources, Engagement |
| 7. At your site, who is involved in returning results to participants? | PI, Nurse, Coordinator, Fellow/Resident, Other | Inner Setting, Process | Structural Characteristics, Roles & Responsibilities |
| 9. How often do participants have questions about what their results mean? | Never, Occasionally, Sometimes, Often, Always | Outer Setting, Process | Participant Needs & Resources, Feedback |
| 10. Do you feel you have answers to participants’ questions about their results? | Never, Occasionally, Sometimes, Often, Always | Characteristics of Individuals | Knowledge & Beliefs about the Intervention |
| 11. How comfortable do you feel returning research results? (0–10 scale) | 0 (Not at all) to 10 (Very comfortable) | Characteristics of Individuals | Self-Efficacy |
| 12. Describe any benefits to returning results to LHC participants. | Open-ended | Intervention Characteristics | Evidence Strength & Quality, Relative Advantage |
| 13. Describe any challenges experienced with returning results. | Open-ended | Inner Setting, Process | Implementation Climate, Barriers |
| 14. How can you be better supported in returning results? | Open-ended | Inner Setting, Process | Readiness for Implementation, Available Resources |

***CFIR Domains:** Intervention Characteristics: Features of the activity or change being implemented. Inner Setting: Organizational context and structure at the site. Outer Setting: Patient/community needs, peer pressure, external policy. Characteristics of Individuals: Knowledge, beliefs, self-efficacy. Process: Planning, engaging, executing, reflecting.

**Some questions align with multiple CFIR domains or constructs, reflecting interconnections in implementation research.

**Supplement C:** Focus Group Guide Informed by CFIR Framework

LHC Coordinator Discussion Questions: Thursday March 13, 2025

| **Question** | **CFIR Domain** | **CFIR Construct(s)** |
| --- | --- | --- |
| 1. What challenges have you experienced when communicating test results to participants? | Inner Setting; Process | Networks & Communications; Implementation Climate; Reflecting & Evaluating |
| 1. What formats (e.g., written templates, digital tools, scripts) would be most useful? | Intervention Characteristics | Design Quality & Packaging; Adaptability; Complexity |
| 1. Are there specific results that are more challenging to explain? If so, what support needed? | Intervention Characteristics; Individuals | Complexity; Knowledge & Beliefs; Self-Efficacy |
| 1. What kind of scripts or suggested language would be most helpful when delivering results? | Intervention Characteristics | Design Quality & Packaging; Adaptability |
| 1. How often do you encounter participants lacking insurance or regular healthcare access? | Outer Setting | Patient Needs & Resources |
| 1. What resources would be most beneficial for these participants (e.g., referral lists, etc.)? | Outer Setting | Patient Needs & Resources; External Policy & Incentives |
| 1. How could healthcare navigators or case workers help bridge these gaps? | Inner Setting; Process | Available Resources; Engaging |
| 1. Where do you see gaps or inconsistencies in protocols for returning results? | Process; Inner Setting | Reflecting & Evaluating; Planning |
| 1. In what ways do you feel additional clinical support is needed when returning results? | Individuals; Inner Setting | Access to Knowledge & Information; Available Resources |
| 1. How could we better involve clinical teams in the results-sharing process? | Process; Inner Setting | Engaging; Networks & Communications |
| 1. What specific roles or expertise would help support results interpretation? | Inner Setting; Individuals | Structural Characteristics; Access to Knowledge & Information |
| 1. What barriers do participants face when following up on their results? | Outer Setting; Process | Patient Needs & Resources; Planning |
| 1. What inefficiencies exist in the current results-return workflow? | Process; Inner Setting | Executing; Structural Characteristics |
| 1. How could a more centralized approach improve efficiency and consistency? | Intervention Characteristics; Process | Relative Advantage; Design Quality & Packaging; Planning |
| 1. What logistical challenges should be considered with a centralized model? | Process; Intervention Characteristics | Planning; Complexity; Compatibility |

LHC Investigator Discussion Questions: Friday March 14, 2025

| **Question** | **CFIR Domain** | **CFIR Construct(s)** |
| --- | --- | --- |
| 1. What challenges have you encountered when communicating incidental findings to participants? | Process; Inner Setting | Reflecting & Evaluating; Communications; Implementation Climate; Culture |
| 2. How can these challenges be effectively addressed to improve the return of results process? | Process; Inner Setting | Planning; Tailoring Strategies; Available Resources; Access to Knowledge & Information |
| 3. What additional resources or support would be beneficial to enhance the communication of results? | Inner Setting | Available Resources; Access to Knowledge & Information |
| 4. Does your site require additional clinical expertise for returning results? If so, what specific roles/expertise? | Individuals; Inner Setting | Capability (Individuals' knowledge & skills); Structural Characteristics (Staffing); Access to Knowledge & Information |
| 5. Have you identified any gaps or inconsistencies in the current protocols for returning results? | Process; Inner Setting | Reflecting & Evaluating; Planning; Structural Characteristics |
| 6. What are your perspectives on a centralized approach for returning Chest CT results? Advantages/concerns? | Intervention Characteristics; Inner Setting | Relative Advantage; Design; Complexity; Compatibility; Implementation Climate |
